# Supplementary material
Source: publisher figshare collection journal article supplement (https://acs.figshare.com/ndownloader/files/34119759)
Supplement: Supplementary file 1 [file 34119759]

## SUPPORTING INFORMATION

### Molecular Mechanism of Dual Intercalation in Sac7d-DNA Complexation

Reman Kumar Singh<sup>§[a]</sup> and Arnab Mukherjee<sup>§\*</sup>

<sup>§</sup>Department of Chemistry, Indian Institute of Science Education and Research, Pune-411008, India.

<sup>§</sup>Department of Chemistry, Indian Institute of Technology, Bombay-400076, India.

#### Definition of rotation angle of protein (Sac7d) around DNA:

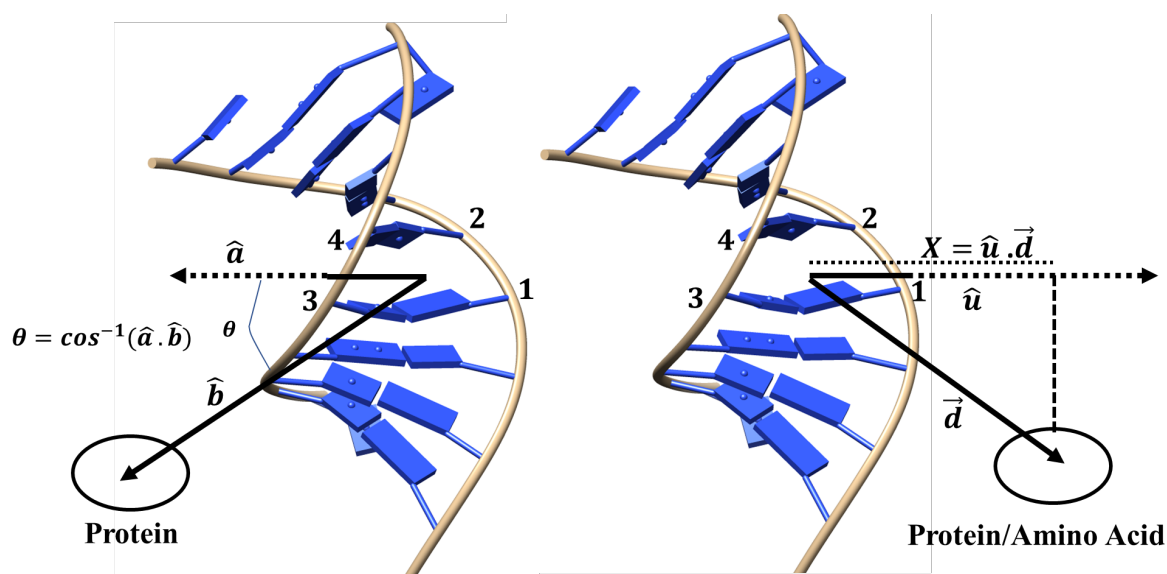

**Figure S1:** Schematic representation of  $X$  and rotation angle used for defining the protein/amino acid intercalation and rotation of protein (Sac7d) around DNA. In left figure, the  $\hat{a}$  represents the unit vector from the center of mass of base 1 and 2 to the center of mass of base 3 and 4. The  $\hat{b}$  represents the unit vector from the center of mass of 1,2,3 and 4 base to center of mass of protein. The dot product of vector The  $\hat{a}$  and  $\hat{b}$  define the angle  $\theta$ . In the right figure, the  $\hat{u}$  represents the unit vector from the center of mass of phosphate of base 4 and 1 to the center of mass of base 1,2,3 and 4. The  $\vec{d}$  represents the distance vector from the center of mass of 1,2,3 and 4 base to center of mass of protein/amino acid. The dot product of the vector  $\hat{u}$  and  $\vec{d}$  define the  $X$  (reaction coordinate for intercalation of amino acid). the base number 1,2,3 and 4 are the schematic representation of intercalating base pair.

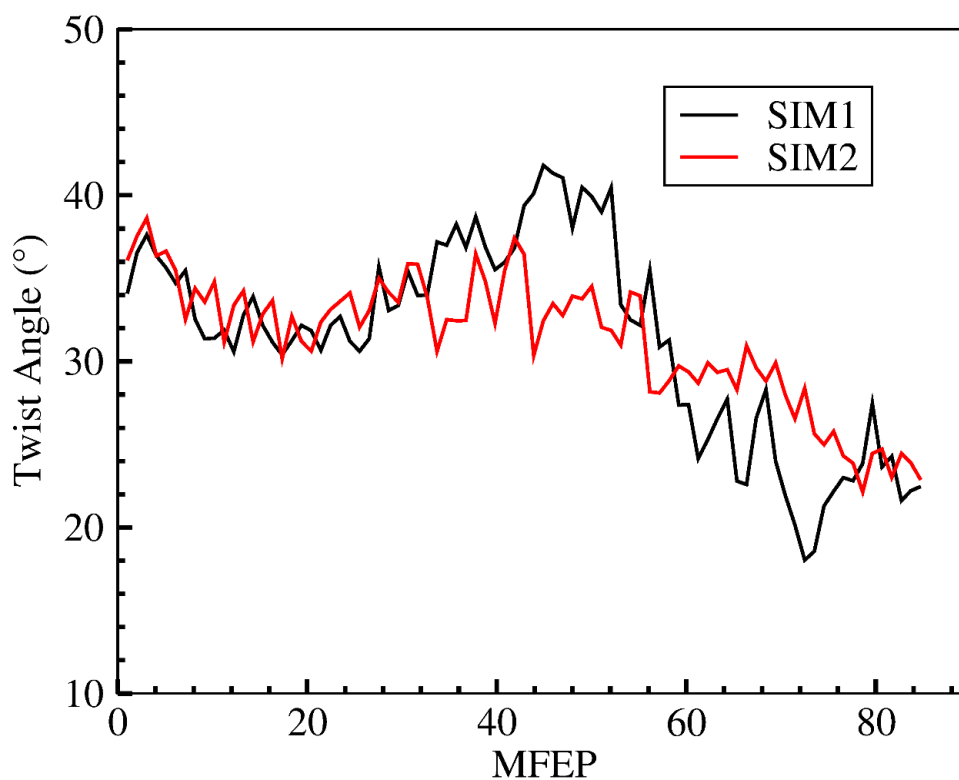

**Figure S2:** Changes in the twist angle of intercalating DNA base step along the protein intercalation (SIM1 is for MET29 intercalation while SIM2 is for VAL26 intercalation). Note that, the twist angle changes drastically around MFEP 60 where the amino acids intercalate into DNA.

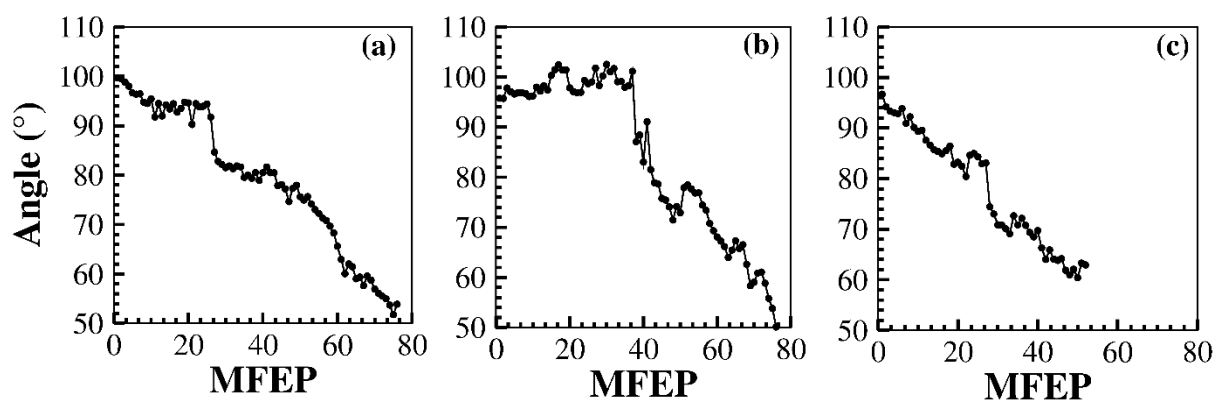

**Figure S3:** Rotation angle of protein during the dissociation (unbinding) from DNA along the MFEP. (a) SIMD-1 (b)SIMD-2 and (c) SIMD-3.

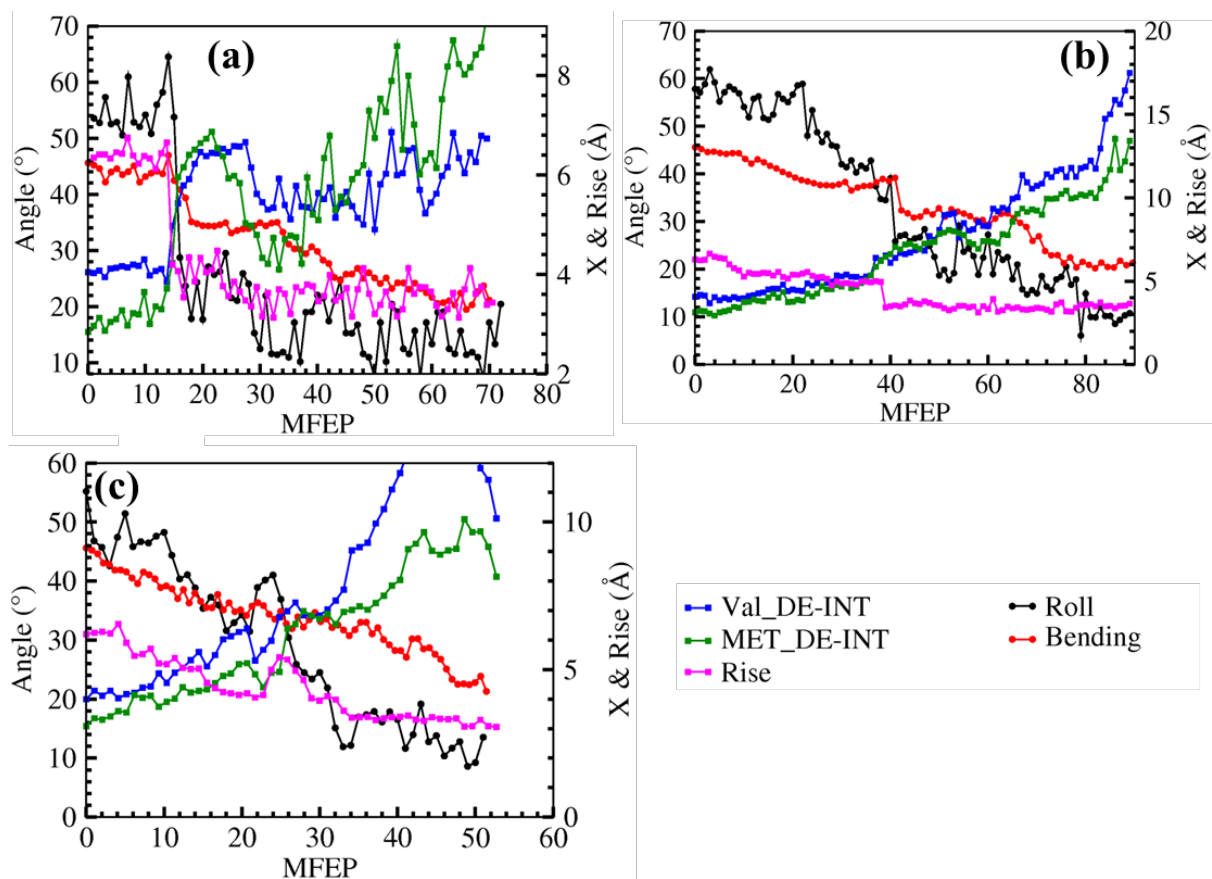

**Figure S4:** Change in the  $X_{Val}$  (Val\_DE-INT),  $X_{MET}$  and DNA parameters for I to F simulation. (a) SIMD-1 (b)SIMD-2 and (c) SIMD-3.

**Table S1:** pKa of all surface amino acid calculated using PropKa module[ref 30,31 of MS].

| Residue Name | Residue number | pKa   |              |
|--------------|----------------|-------|--------------|
| HIS          | 2              | 6.5   | Deprotonated |
| ARG          | 5              | 12.15 | Protonated   |
| GLU          | 17             | 3.08  | Deprotonated |
| ARG          | 18             | 12.5  | Protonated   |
| ARG          | 19             | 12.5  | Protonated   |
| LYS          | 20             | 10.5  | Protonated   |
| GLU          | 23             | 4.5   | Deprotonated |
| ASP          | 27             | 3.8   | Deprotonated |
| HIS          | 29             | 6.43  | Deprotonated |
| GLU          | 32             | 4.41  | Deprotonated |
| LYS          | 35             | 10.22 | Protonated   |
| ARG          | 36             | 12.5  | Protonated   |
| LYS          | 39             | 10.5  | Protonated   |
| ARG          | 40             | 12.5  | Protonated   |
| LYS          | 42             | 10.43 | Protonated   |
| LYS          | 45             | 10.5  | Protonated   |
| ASP          | 46             | 3.8   | Deprotonated |
| ASP          | 48             | 3.69  | Deprotonated |
| LYS          | 49             | 10.5  | Protonated   |
| GLU          | 55             | 3.7   | Deprotonated |

|     |    |       |              |
|-----|----|-------|--------------|
| GLU | 57 | 4.1   | Deprotonated |
| ARG | 58 | 12.5  | Protonated   |
| ARG | 60 | 12.43 | Protonated   |
| LYS | 62 | 10.5  | Protonated   |
| HIS | 63 | 6.5   | Deprotonated |
| ASP | 66 | 3.8   | Deprotonated |
| TYR | 67 | 10.79 | Protonated   |
| ASP | 69 | 3.8   | Deprotonated |
| TYR | 70 | 10    | Protonated   |
| LYS | 71 | 10.5  | Protonated   |
| TYR | 72 | 9.39  | Protonated   |
| ARG | 73 | 12.5  | Protonated   |
| ARG | 75 | 12.5  | Protonated   |
| LYS | 76 | 10.36 | Protonated   |
